# Supplementary material for: Ten‐Year Trends in Enrollment of Women and Minorities in Pivotal Trials Supporting Recent US Food and Drug Administration Approval of Novel Cardiometabolic Drugs
Source: PubMed Central journal article supplement — J Am Heart Assoc. 2020 Jun 13;9(11):e015594. doi: 10.1161/JAHA.119.015594 (PMC7428976; doi:10.1161/jaha.119.015594), 2020-06-13
Supplement: JAH3-9-e015594-s001.pdf [file JAH3-9-e015594-s001.pdf]

# **Supplemental Material**

**Table S1. Details of Data Extraction and Discrepancy Observed between Approval label and Trial Publication.**

| <b>Drug</b>  | <b>Data Extraction Source*</b> | <b>Discrepancy between approval label and trial publication (yes/no)</b> | <b>Additional comments regarding extraction/discrepancy</b>                                                                                                                                                                                                                                            |
|--------------|--------------------------------|--------------------------------------------------------------------------|--------------------------------------------------------------------------------------------------------------------------------------------------------------------------------------------------------------------------------------------------------------------------------------------------------|
| Regadenoson  | Trial publication              | No                                                                       | NA                                                                                                                                                                                                                                                                                                     |
| Clevidipine  | Trial publication              | No                                                                       | Approval label did not state percentage race for ESCAPE-1 and ESCAPE-2 trials and baseline characteristics for VELOCITY and ECLIPSE trial                                                                                                                                                              |
| Dronedarone  | Trial publication              | No                                                                       | NA                                                                                                                                                                                                                                                                                                     |
| Prasugel     | Trial publication              | No                                                                       | NA                                                                                                                                                                                                                                                                                                     |
| Saxagliptin  | Trial publication              | No                                                                       | NA                                                                                                                                                                                                                                                                                                     |
| Pitavastatin | Trial publication              | NA                                                                       | Approval label did not state baseline characteristics of study population.                                                                                                                                                                                                                             |
| Liraglutide  | Approval label                 | No                                                                       | Approval label reported overall baseline characteristics of all pivotal trials. Since there was no discrepancy between individual trial publications and data listed in approval label, approval label was preferred to extract data since it listed overall percentage participation of sex and race. |
| Dabigatran   | Approval label                 | No                                                                       | Trial publication did not report percentage race.                                                                                                                                                                                                                                                      |
| Azilsartan   | Approval label                 | NA                                                                       | Trial publication was not found. All data was available in the approval label                                                                                                                                                                                                                          |
| Linagliptin  | Approval label                 | No                                                                       | Approval label reported overall baseline characteristics of all pivotal trials. Since there was no discrepancy between individual trial publications and data listed in approval label, approval label was preferred to extract data since it listed overall percentage participation of sex and race. |
| Rivaroxaban  | Trial publication              | Yes                                                                      | Discrepancy recorded between total number of participants in Record 1 and                                                                                                                                                                                                                              |

|                     |                   |     |                                                                                                                                                                                                                                   |
|---------------------|-------------------|-----|-----------------------------------------------------------------------------------------------------------------------------------------------------------------------------------------------------------------------------------|
|                     |                   |     | Record 2 studies. Approval label states 6579 receiving study drug while trial publication states 6890 participants receiving study drug. No discrepancy in Record 3 study or percentage participation by sex or race was recorded |
| Ticagrelor          | Trial publication | No  | Approval label only listed percentage White/Caucasian when compared to trial publication which listed percentage participation of other under-represented minorities as well (Black/African American and Asian).                  |
| Lomitapide Mesylate | Approval label    | NA  | Trial publication was not found. All data was available in the approval label                                                                                                                                                     |
| Apixaban            | Trial publication | No  | Race was not included in baseline characteristics for ARISTOTLE study publication. Data for race obtained from approval label.                                                                                                    |
| Alogliptin Benzoate | Trial publication | No  | NA                                                                                                                                                                                                                                |
| Mipomersen          | Approval label    | No  | Trial publication did not report percentage race                                                                                                                                                                                  |
| Canagliflozin       | Trial publication | No  | NA                                                                                                                                                                                                                                |
| Riociguat           | Trial publication | NA  | Approval label did not state baseline characteristics of study population.                                                                                                                                                        |
| Macitentan          | Trial publication | No  | NA                                                                                                                                                                                                                                |
| Dapagliflozin       | Trial publication | NA  | Approval label did not state baseline characteristics of study population.                                                                                                                                                        |
| Vorapaxar Sulfate   | Trial publication | Yes | Mild discrepancy between sex and race was recorded. Approval label states 22% females and 89% White/Caucasian while trial publication lists 24% females and 87% White/Caucasian                                                   |
| Empagliflozin       | Trial publication | NA  | Approval label did not state baseline characteristics of study population.                                                                                                                                                        |
| Edoxaban            | Trial publication | No  | Race was not included in baseline characteristics for both publications. Data for                                                                                                                                                 |

|                          |                   |    |                                                                                                                                                |
|--------------------------|-------------------|----|------------------------------------------------------------------------------------------------------------------------------------------------|
|                          |                   |    | race was obtained from approval label.                                                                                                         |
| Ivabradine Hydrochloride | Trial publication | No | Approval label did not state baseline characteristics (sex and race) of study population.                                                      |
| Cangrelor                | Trial publication | NA | Approval label did not state baseline characteristics of study population.                                                                     |
| Sacubitril; Valsartan    | Trial publication | No | NA                                                                                                                                             |
| Insulin Degludec         | Approval label    | NA | Trial publication was not found. All data was available in the approval label                                                                  |
| Selexipag                | Approval label    | No | Trial publication did not report percentage race                                                                                               |
| Alirocumab               | Trial publication | No | NA                                                                                                                                             |
| Evolocumab               | Trial publication | No | For study 1 and study 2, approval label reports baseline characteristics for patients with atherosclerotic CVD only, not the total population. |
| Lixisenatide             | Approval label    | NA | Trial publication was not found. All data was available in the approval label                                                                  |
| Betrixaban               | Trial publication | No | NA                                                                                                                                             |
| Semaglutide              | Trial publication | No | NA                                                                                                                                             |
| Ertugliflozin            | Trial publication | NA | Approval label did not state baseline characteristics of study population.                                                                     |
| Angiotensin II Acetate   | Approval label    | No | Trial publication did not report percentage race.                                                                                              |

\*Extraction details for total population, sex and race

NA = Not Applicable

---

**Table S2. Estimation of Percentage of Women in Disease Populations.**

| <b>Disease</b>                         | <b>Men</b>                          | <b>Women</b>                         | <b>% women in disease population</b> | <b>Source</b>                                                                                                                                                                                                                                                                                     |
|----------------------------------------|-------------------------------------|--------------------------------------|--------------------------------------|---------------------------------------------------------------------------------------------------------------------------------------------------------------------------------------------------------------------------------------------------------------------------------------------------|
| <b>Acute Coronary Syndrome</b>         | 785,000 (unique hospitalisations)*  | 554,000 (unique hospitalisations)*   | 41                                   | Global, regional, and national comparative risk assessment of 79 behavioural, environmental and occupational, and metabolic risks or clusters of risks, 1990-2015: a systematic analysis for the Global Burden of Disease Study 2015. <i>Lancet (London, England)</i> . 2016;388(10053):1659-1724 |
| <b>Coronary Heart Disease ~</b>        | 68,287,106 (prevalence) ‡           | 57,705,137 (prevalence) ‡            | 46                                   | GBD Compare   IHME Viz Hub. Vizhub.healthdata.org. <a href="https://vizhub.healthdata.org/gbd-compare/">https://vizhub.healthdata.org/gbd-compare/</a> . [Accessed January 9, 2020.]                                                                                                              |
| <b>Heart Failure</b>                   | 60% (distribution) ^                | 40% (distribution) ^                 | 40                                   | Lee DS, Gona P, Vasan RS, et al. Relation of Disease Pathogenesis and Risk Factors to Heart Failure with Preserved or Reduced Ejection Fraction. <i>Circulation</i> 2009; 119:3070-3077                                                                                                           |
| <b>Atrial Fibrillation</b>             | 19,721,283 (prevalence) ‡           | 17,703,069 (prevalence) ‡            | 47                                   | GBD Compare   IHME Viz Hub. Vizhub.healthdata.org. <a href="https://vizhub.healthdata.org/gbd-compare/">https://vizhub.healthdata.org/gbd-compare/</a> . [Accessed January 9, 2020.]                                                                                                              |
| <b>Hypertension</b>                    | 694,000,000 (prevalence) !          | 694,000,000 (prevalence) !           | 50                                   | Mills KT, Bundy JD, Kelly TN, Reed JE, Kearney PM, Reynolds K, Chen J, He J. Global disparities of hypertension prevalence and control: a systematic analysis of population-based studies from 90 countries. <i>Circulation</i> . 2016;134:441-450. doi: 10.1161/CIRCULATIONAHA.115.018912.       |
| <b>Pulmonary Arterial Hypertension</b> | 110 per 100,000 (hospitalization) § | 147 per 100,000 (hospitalizations) § | 57                                   | George MG, Schieb LJ, Ayala C, et al. Pulmonary Hypertension Surveillance United States, 2001 to 2010. <i>Chest</i> 2014; 146(2):476-495, p. 484                                                                                                                                                  |

| Disease                      | Men                        | Women                      | % women in disease population | Source                                                                                                                                                                                                                            |
|------------------------------|----------------------------|----------------------------|-------------------------------|-----------------------------------------------------------------------------------------------------------------------------------------------------------------------------------------------------------------------------------|
| <b>Diabetes Mellitus</b>     | 244,463,507 (prevalence) † | 229,640,671 (prevalence) † | 48                            | GBD Compare   IHME Viz Hub. <a href="https://vizhub.healthdata.org">Vizhub.healthdata.org</a> . <a href="https://vizhub.healthdata.org/gbd-compare/">https://vizhub.healthdata.org/gbd-compare/</a> . [Accessed January 9, 2020.] |
| <b>Hyper-cholesterolemia</b> | 42,300,000 (prevalence) #  | 52,300,000 (prevalence) #  | 55                            | Benjamin EJ, Virani SS, Callaway CW, et al. Heart Disease and Stroke Statistics-2018 Update: A Report From the American Heart Association. <a href="#">Circulation</a> . 2018; 137:e67-e492.                                      |

\* Based on first and secondary discharge post hospitalization from National Hospital Discharge Survey, NHLBI in 2014

† GBD global prevalence for all ages

~ Data for Ischemic Heart Disease was utilized from the GBD database.

§ Hospitalization rates in 2009/2010

! Estimated adults aged ≥ 20 years

#Prevalence of TC ≥ 200 mg/dl, 2011-2014: Age ≥ 20 years

^ Patients with reduced ejection fraction in the Framingham HF study

**Table S3. Participation of Women across Disease Indication.**

| Disease Indication              | Number of Drugs | Number of Trials | Overall Enrollment, N | Women Enrollment, n | Percentage of Women Participants, % | Percentage of Women Among Disease Population, % | Participation to Prevalence Ratio (PPR) |
|---------------------------------|-----------------|------------------|-----------------------|---------------------|-------------------------------------|-------------------------------------------------|-----------------------------------------|
| Acute Coronary Syndrome         | 3               | 3                | 43174                 | 11878               | 28                                  | 41                                              | 0.68                                    |
| Coronary Heart Disease          | 1               | 1                | 26449                 | 6326                | 24                                  | 46                                              | 0.52                                    |
| Heart Failure                   | 2               | 4                | 44923                 | 10500               | 23                                  | 40                                              | 0.58                                    |
| Atrial Fibrillation             | 6               | 13               | 94624                 | 39152               | 41                                  | 42                                              | 0.98                                    |
| Hypertension                    | 2               | 13               | 7788                  | 3434                | 44                                  | 50                                              | 0.88                                    |
| Pulmonary Arterial Hypertension | 3               | 4                | 2602                  | 2016                | 77                                  | 57                                              | 1.35                                    |
| Diabetes Mellitus               | 11              | 86               | 64282                 | 29352               | 46                                  | 48                                              | 0.96                                    |
| Hypercholesterolemia            | 5               | 16               | 10129                 | 4691                | 46                                  | 55                                              | 0.84                                    |

**Table S4. Summary of Efficacy\* and Safety# Results by Sex for Diabetes Drugs.**

| Drug                      | Primary efficacy endpoint | Efficacy of Drug by sex                                                                                                                                                                                         | Drug related adverse events by sex                                                                                                                                                                                 | Source†                     |
|---------------------------|---------------------------|-----------------------------------------------------------------------------------------------------------------------------------------------------------------------------------------------------------------|--------------------------------------------------------------------------------------------------------------------------------------------------------------------------------------------------------------------|-----------------------------|
| Saxagliptin Hydrochloride | Changes from baseline in  | Monotherapy study yielded a “statistically significant interaction for sex with a p-value of 0.01; a larger effect is seen for males than females. This subgroup difference was not observed in other studies.” | NR                                                                                                                                                                                                                 | Clinical/Statistical Review |
| Liraglutide               |                           | Efficacy was not affected by sex                                                                                                                                                                                | NR                                                                                                                                                                                                                 | Clinical/Statistical Review |
| Linagliptin               |                           | Efficacy was not affected by sex                                                                                                                                                                                | NR                                                                                                                                                                                                                 | Clinical/Statistical Review |
| Alogliptin Benzoate       |                           | Efficacy was not affected by sex                                                                                                                                                                                | NR                                                                                                                                                                                                                 | Approval Label              |
| Canagliflozin             |                           | Efficacy was not affected by sex                                                                                                                                                                                | Increased risk genital mycotic infections in both males and females. However Patients with a history of genital mycotic infections and uncircumcised males were more likely to develop genital mycotic infections. | Clinical/Statistical Review |
| Dapagliflozin             |                           | Efficacy was not affected by sex                                                                                                                                                                                | “Genital mycotic infections were more frequently reported in females than in males.”                                                                                                                               | Clinical/Statistical Review |
| Empagliflozin             |                           | “For comparison between                                                                                                                                                                                         | “Genital mycotic                                                                                                                                                                                                   | Clinical/Statistical Review |



|                  |                     |                                                                                                                                                                                                                                                                                                                                                                                          |                                                                                          |                             |
|------------------|---------------------|------------------------------------------------------------------------------------------------------------------------------------------------------------------------------------------------------------------------------------------------------------------------------------------------------------------------------------------------------------------------------------------|------------------------------------------------------------------------------------------|-----------------------------|
|                  | hemoglobin<br>HbA1C | empagliflozin 25mg and placebo, the subgroup analysis by sex shows a greater treatment effect in males (mean= -0.76, SE=0.05) than in females (mean=-0.58, SE=0.06). The p value for the treatment-by-sex interaction term is 0.03. However, for the comparison between empagliflozin 10mg and placebo, no heterogeneity of treatment effect is detected in males vs. females (P=0.18).” | infections occurred more frequently in female than male patients.”                       |                             |
| Insulin Degludec |                     | Efficacy was not affected by sex                                                                                                                                                                                                                                                                                                                                                         | NR                                                                                       | Clinical/Statistical Review |
| Lixisenatide     |                     | Efficacy was not affected by sex                                                                                                                                                                                                                                                                                                                                                         | NR                                                                                       | Clinical/Statistical Review |
| Semaglutide      |                     | “In trial 3625 (SUSTAIN 4), a slightly higher effect was seen in females compared to males with the 0.5 mg dose (-0.45 versus -0.11, nominal p-value = 0.03), but there was no difference with the 1.0 mg dose.”                                                                                                                                                                         | NR                                                                                       | Clinical/Statistical Review |
| Ertugliflozin    |                     | Efficacy was not affected by sex                                                                                                                                                                                                                                                                                                                                                         | Female genital mycotic infections were more common than male genital mycotic infections. | Clinical/Statistical Review |

\* We evaluated sex difference in efficacy results by reviewing the product labeling first. If the information is not available in labeling, we then obtained efficacy results by sex from FDA clinical and statistical reviews.

# Safety results were obtained by reviewing product labelling. Only clinically meaningful differences in safety by sex are described in labelling. If these differences are not identified then they are often not reported. Product labelling that did not report any statement regarding clinically meaningful effect between drug related adverse effects is reported as NR.

NR = Not Reported

† Refers to the source from where efficacy results were obtained.

---

**Table S5. HRs and 95% CI for Primary Efficacy Endpoints by sex.**

| Drug/Sex                        | Number of patients | Hazard Ratio [95% CI] <sup>†</sup> |
|---------------------------------|--------------------|------------------------------------|
| <b>Dronedarone</b>              |                    |                                    |
| Male                            | 2,459              | 0.74 [0.64, 0.85]                  |
| Female                          | 2,169              | 0.77 [0.67, 0.89]                  |
| <b>Dabigatran</b>               |                    |                                    |
| Male                            | 11,514             | 0.72 [0.54, 0.95]                  |
| Female                          | 6,598              | 0.58 [0.40, 0.79]                  |
| <b>Apixaban</b>                 |                    |                                    |
| Male                            | 11,785             | 0.82 [0.65, 1.04]                  |
| Female                          | 6,416              | 0.74 [0.56, 1.00]                  |
| <b>Edoxaban</b>                 |                    |                                    |
| Male                            | 8,761              | 0.87 [0.71, 1.07]                  |
| Female                          | 5,310              | 0.87 [0.69, 1.11]                  |
| <b>Prasugrel</b>                |                    |                                    |
| Male                            | 10,085             | 0.79 [0.70, 0.90]                  |
| Female                          | 3,523              | 0.88 [0.73, 1.07]                  |
| <b>Ticagrelor</b>               |                    |                                    |
| Male                            | 13,336             | 0.85 [0.76, 0.95]                  |
| Female                          | 5,288              | 0.83 [0.71, 0.97]                  |
| <b>Cangrelor</b>                |                    |                                    |
| Male                            | 7,889              | 0.84 [0.69, 1.03]                  |
| Female                          | 3,050              | 0.67 [0.50, 0.92]                  |
| <b>Macitentan</b>               |                    |                                    |
| Male                            | 113                | 0.49 [0.27, 0.89]                  |
| Female                          | 379                | 0.57 [0.41, 0.80]                  |
| <b>Selexipag</b>                |                    |                                    |
| Male                            | 233                | 0.56 [0.31, 1.02]*                 |
| Female                          | 923                | 0.61 [0.46, 0.82]*                 |
| <b>Ivabradine Hydrochloride</b> |                    |                                    |
| Male                            | 4, 970             | 0.84 [0.76, 0.94]                  |
| Female                          | 1, 535             | 0.74 [0.60, 0.91]                  |
| <b>Sacubitril; Valsartan</b>    |                    |                                    |
| Male                            | 6,595              | 0.80 [0.73, 0.89]                  |
| Female                          | 1, 847             | 0.77 [0.62, 0.94]                  |
| <b>Vorapaxar Sulfate</b>        |                    |                                    |
| Male                            | 15,801             | 0.82 [0.74, 0.91]                  |
| Female                          | 4,369              | 0.84 [0.70, 1.00]                  |
| <b>Angiotensin II Acetate</b>   |                    |                                    |
| Male                            | 195                | 9.3 [4.9, 17.9] <sup>#</sup>       |
| Female                          | 126                | 5.9 [2.7, 13.1] <sup>#</sup>       |

<sup>†</sup> Includes results for primary efficacy endpoint for each drug by sex. Results do not take into account any comparisons or adjustments for any other factor.

\* Represents 99% Confidence Interval

<sup>#</sup> Odds ratio was reported

**Table S6. Summary of Efficacy\* and Safety Results# by Sex for Cardiovascular Drugs.**

| Cardiovascular Area/Drug               | Primary efficacy endpoint                                                     | Efficacy of Drug by sex          | Drug related adverse events by sex      | Source <sup>‡</sup>         |
|----------------------------------------|-------------------------------------------------------------------------------|----------------------------------|-----------------------------------------|-----------------------------|
| <b>Atrial Fibrillation</b>             |                                                                               |                                  |                                         |                             |
| Dronedarone                            | Hospitalization for cardiovascular reasons or death from any cause.           | Efficacy was not affected by sex | Adverse events were not affected by sex | Approval Label              |
| Dabigatran                             | Stroke and systemic embolism                                                  | Efficacy was not affected by sex | Adverse events were not affected by sex | Approval Label              |
| Rivaroxaban                            | Incidences of DVT, non-fatal PE or all-cause death                            | Efficacy was not affected by sex | NR                                      | Clinical/Statistical Review |
| Apixaban                               | Ischemic stroke, hemorrhagic stroke or systemic embolism                      | Efficacy was not affected by sex | Adverse events were not affected by sex | Clinical/Statistical Review |
| Edoxaban                               | Occurrence of stroke or a systemic emboli                                     | Efficacy was not affected by sex | Adverse events were not affected by sex | Approval Label              |
| Betrixaban                             | Asymptomatic proximal DVT, Symptomatic DVT, Non-fatal PE or VTE related death | Efficacy was not affected by sex | NR                                      | Clinical/Statistical Review |
| <b>Acute Coronary Syndrome</b>         |                                                                               |                                  |                                         |                             |
| Prasugrel                              | cardiovascular death, nonfatal MI, or nonfatal stroke                         | Efficacy was not affected by sex | NR                                      | Approval Label              |
| Ticagrelor                             |                                                                               |                                  |                                         |                             |
| Cangrelor                              | all-cause death, MI, ischemia-driven revascularization, and stent thrombosis  | Efficacy was not affected by sex | Adverse events were not affected by sex | Approval Label              |
| <b>Hypertension</b>                    |                                                                               |                                  |                                         |                             |
| Clevidipine                            | Changes from baseline in systolic blood pressure (mmHg)                       | Efficacy was not affected by sex | NR                                      | Clinical/Statistical Review |
| Azilsartan                             |                                                                               |                                  | Adverse events were not affected by sex | Approval Label              |
| <b>Pulmonary Arterial Hypertension</b> |                                                                               |                                  |                                         |                             |
| Riociguat                              | changes from baseline in the 6-                                               | Efficacy was not affected by sex | NR                                      | Clinical/Statistical Review |

|                               |                                                                                                |                                                                                                                                                                                                                                         |                                         |                             |
|-------------------------------|------------------------------------------------------------------------------------------------|-----------------------------------------------------------------------------------------------------------------------------------------------------------------------------------------------------------------------------------------|-----------------------------------------|-----------------------------|
|                               | minute walk distance (m)                                                                       |                                                                                                                                                                                                                                         |                                         |                             |
| Macitentan                    | time to the first occurrence of death, Changes from baseline in the 6-minute walk distance (m) | Efficacy was not affected by sex                                                                                                                                                                                                        | NR                                      | Approval Label              |
| Selexipag                     | Death, hospitalization for PAH, changes from baseline in the 6-minute walk distance (m)        | Efficacy was not affected by sex                                                                                                                                                                                                        | NR                                      | Approval Label              |
| <b>Heart Failure</b>          |                                                                                                |                                                                                                                                                                                                                                         |                                         |                             |
| Ivabradine Hydrochloride      | Cardiovascular death, hospitalization for worsening heart failure                              | Efficacy was not affected by sex                                                                                                                                                                                                        | NR                                      | Approval Label              |
| Sacubitril; Valsartan         |                                                                                                | Efficacy was not affected by sex                                                                                                                                                                                                        | NR                                      | Approval Label              |
| <b>Coronary Heart Disease</b> |                                                                                                |                                                                                                                                                                                                                                         |                                         |                             |
| Vorapaxar Sulfate             | Cardiovascular death, MI, stroke                                                               | Efficacy was not affected by sex                                                                                                                                                                                                        | Adverse events were not affected by sex | Approval Label              |
| <b>Hypercholesterolemia</b>   |                                                                                                |                                                                                                                                                                                                                                         |                                         |                             |
| Pitavastatin                  | Percentage decrease from baseline to study end point in LDL-C                                  | “In study NK-104305 females experienced greater LDL-C lowering than did males on Livalo compared to controls.”                                                                                                                          | NR                                      | Clinical/Statistical Review |
| Lomitapide Mesylate           |                                                                                                | Efficacy was not affected by sex                                                                                                                                                                                                        | NR                                      | Clinical/Statistical Review |
| Mipomersen                    |                                                                                                | “the treatment effect in females was larger than that seen in males” *                                                                                                                                                                  | NR                                      | Clinical/Statistical Review |
| Alirocumab                    |                                                                                                | “There is an indication that the effect for Praluent on the percent change in LDL-C at week 24 is larger in males than females; however, it is unclear whether this difference between sexes in the effect on a surrogate endpoint will | NR                                      | Clinical/Statistical Review |

|                        |                                                  |                                                                                               |    |                             |
|------------------------|--------------------------------------------------|-----------------------------------------------------------------------------------------------|----|-----------------------------|
|                        |                                                  | translate into an important difference between sexes in the clinical cardiovascular outcome.” |    |                             |
| Evolocumab             |                                                  | Efficacy was not affected by sex                                                              | NR | Clinical/Statistical Review |
| <b>Other</b>           |                                                  |                                                                                               |    |                             |
| Regadenoson            | Presence/absence of reversible perfusion defects | Efficacy was not affected by sex                                                              | NR | Clinical/Statistical Review |
| Angiotensin II Acetate | Clinical response of LJPC-501 infusion on MAP    | Efficacy was not affected by sex                                                              | NR | Clinical/Statistical Review |

\* We evaluated sex difference in efficacy results by reviewing the product labeling first. If the information is not available in labeling, we then obtained efficacy results by sex from FDA clinical and statistical reviews.

# Safety results were obtained by reviewing product labelling. Only clinically meaningful differences in safety by sex are described in labelling. If these differences are not identified then they are often not reported. Product labelling that did not report any statement regarding no clinically meaningful effect between drug related adverse effects is reported as NR.

† Refers to the source from where efficacy results were obtained.

DVT= deep vein thrombosis. PE= pulmonary embolism. VTE= venous thromboembolism. MI= myocardial infarction. MAP= mean arterial pressure. NR = Not Reported

---

**Table S7. Number of Pivotal Drug trials reporting data of ethnic/racial minorities.**

| <b>Race</b>            | <b>No. of Trials reporting data</b> | <b>Overall Population in trials reporting data, N</b> | <b>Participation of Race, n (%)</b> |
|------------------------|-------------------------------------|-------------------------------------------------------|-------------------------------------|
| White/Caucasian        | 122                                 | 269,176                                               | 218,054 (81.0)                      |
| Black/African American | 104                                 | 175,487                                               | 6,325 (3.6)                         |
| Asian                  | 76                                  | 178,004                                               | 22,076 (12.4)                       |
| <b>Ethnicity</b>       |                                     |                                                       |                                     |
| Hispanic/Latino        | 51                                  | 56,235                                                | 6,333 (11.3)                        |
